# Supplementary material for: A new insight into the ZIF-67 based triboelectric nanogenerator for self-powered robot object recognition
Source: Royal Society of Chemistry journal article supplement (doi:10.1039/d1tc04729a), 2021-01-01
Supplement: d1tc04729a1.pdf [file d1tc04729a1.pdf]

## **Supporting Information**

### **A new insight into ZIF-67 based triboelectric nanogenerator for self-powered robot object recognition**

*<sup>1</sup>Sugato Hajra, <sup>1</sup>Manisha Sahu, <sup>2</sup>Aneeta Manjari Padhan, <sup>3</sup>Jaykishon Swain, <sup>4</sup>Basanta Kumar Panigrahi, <sup>1</sup>Hang-Gyeom Kim, <sup>1</sup>Sang-Won Bang, <sup>1</sup>Sukho Park, <sup>3\*</sup>Rojalin Sahu, <sup>1\*</sup>Hoe Joon Kim*

<sup>1</sup>Department of Robotics Engineering, Daegu Gyeongbuk Institute of Science and Technology, Daegu-42988, South Korea

<sup>2</sup>Department of Physics, Indian Institute of Technology-Guwahati, Assam-781039, India

<sup>3</sup>School of Applied Sciences, Kalinga Institute of Industrial Technology (Deemed to be University), Bhubaneswar, India

<sup>4</sup>Department of Electrical Engineering, ITER, Siksha O Anusandhan (Deemed to be University), Bhubaneswar-751030, India

#### **\*Corresponding Authors:**

**Professor Hoe Joon Kim (joonkim@dgist.ac.kr)**

**Professor Rojalin Sahu (rsahufch@kiit.ac.in)**

**Figure S1:** Simulated XRD pattern of ZIF-67 particle.

**Figure S2:** Surface micrographs of bare copper electrode and ZIF-67 firmly attached upon copper electrode.

**Figure S3:** Wavelet transformation of the S-TENG signals generated from the gaits of the seven volunteers.

**Table S4:** Comparison of the electrical output of the MOF based TENG devices.

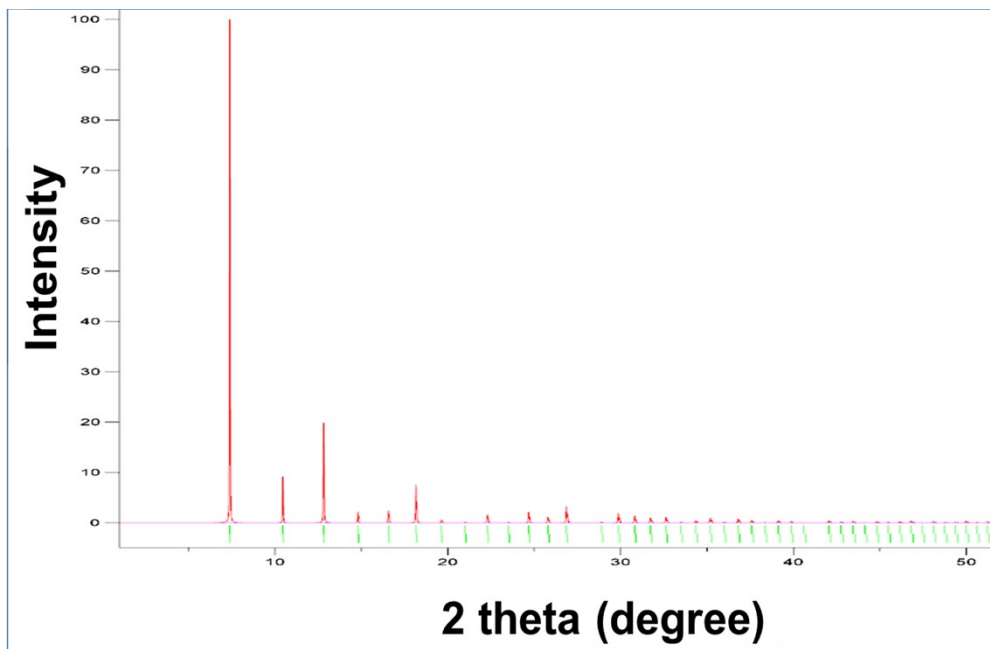

**Figure S1**

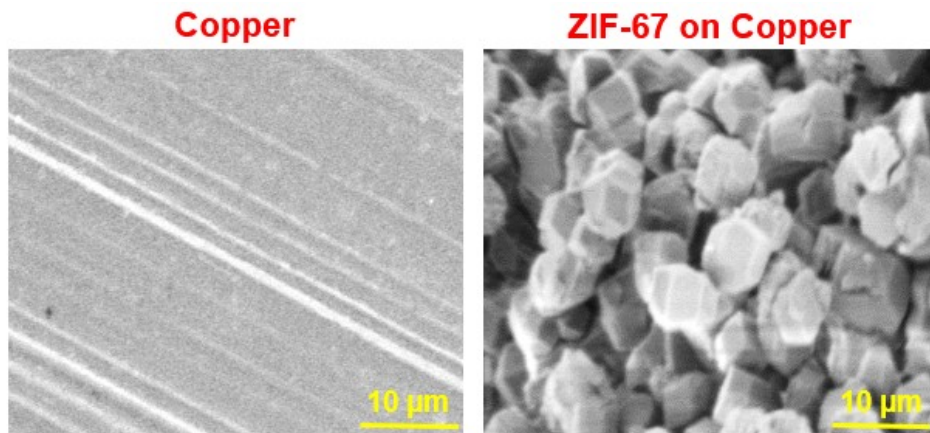

**Figure S2**

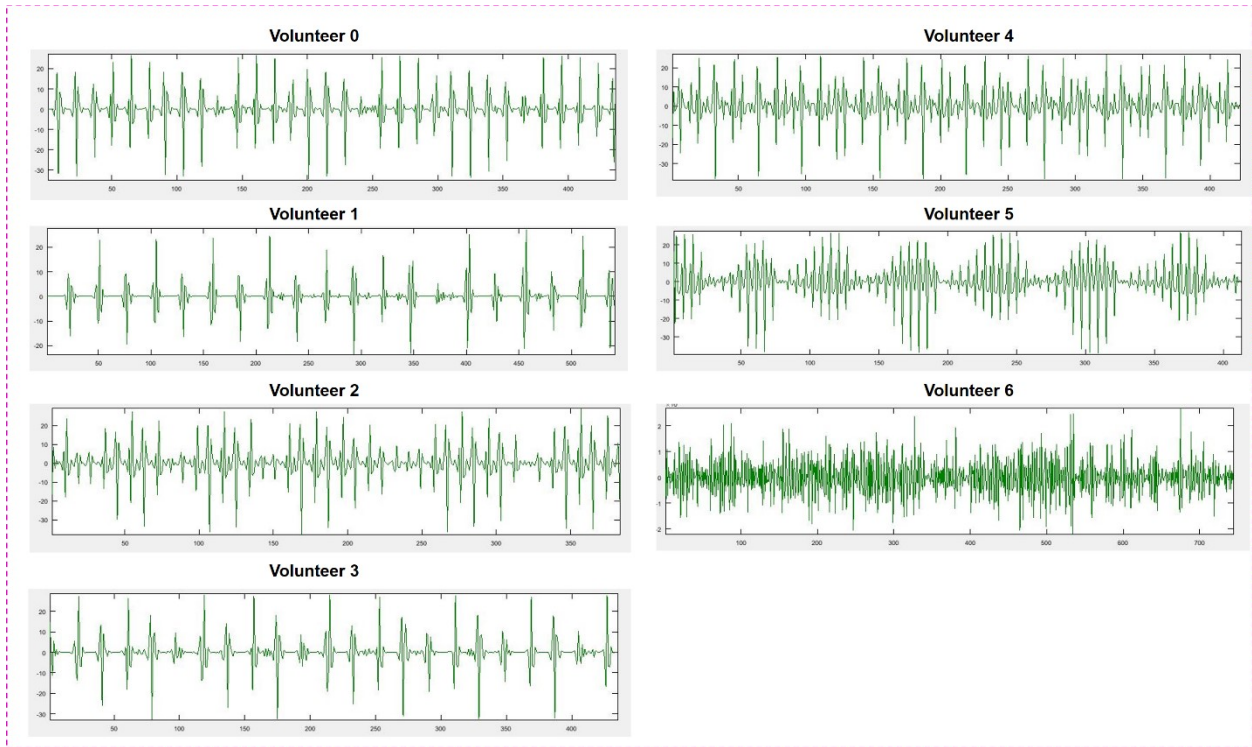

**Figure S3**

**Table S4**

| <b>Positive layer</b> | <b>Negative layer</b> | <b>Voltage (V)</b> | <b>Working Mode</b>     | <b>Ref</b>       |
|-----------------------|-----------------------|--------------------|-------------------------|------------------|
| ZIF-11                | Kapton                | 27                 | Contact separate        | 1                |
| ZIF-12                | Kapton                | 42                 | Contact separate        | 1                |
| ZIF-9                 | Kapton                | 29                 | Contact separate        | 1                |
| ZIF-7                 | Kapton                | 60                 | Contact separate        | 1                |
| ZIF-62                | Teflon                | 62                 | Contact separate        | 2                |
| <b>ZIF-67</b>         | <b>Teflon</b>         | <b>118</b>         | <b>Contact separate</b> | <b>This Work</b> |

**References:**

[1] G. Khandelwal, N.P. Maria Joseph Raj, S.-J. Kim, *Advanced Functional Materials*, 30 (2020) 1910162.

[2] G. Khandelwal, N.P. Maria Joseph Raj, S.-J. Kim, *Journal of Materials Chemistry A*, 8 (2020) 17817-17825.
